# Supplementary material for: Theoretical Characterization of the Step-by-Step Mechanism of Conversion of Leukotriene A4 to Leukotriene B4 Catalysed by the Enzyme Leukotriene A4 Hydrolase
Source: MDPI journal article supplement (doi:10.3390/ijms23063140), 2022-03-15
Supplement: s1 [file s1]

## Supplementary Materials

### Theoretical Characterization of the Step-By-Step Mechanism of Conversion of Leukotriene A<sub>4</sub> to Leukotriene B<sub>4</sub> Catalysed by the Enzyme Leukotriene A<sub>4</sub> Hydrolase

Miquel Canyelles-Niño<sup>1,2</sup>, Àngels González-Lafont<sup>1,3</sup> and José M. Lluch<sup>1,3,\*</sup>

<sup>1</sup> Departament de Química, Universitat Autònoma de Barcelona, 08193 Bellaterra, Barcelona, Spain;  
[Miquel.Canyelles@uab.cat](mailto:Miquel.Canyelles@uab.cat) (M.C.-N.);  
[Angels.Gonzalez@uab.cat](mailto:Angels.Gonzalez@uab.cat) (À.G.-L.);  
[JoseMaria.Lluch@uab.cat](mailto:JoseMaria.Lluch@uab.cat) (J.M.L.).

<sup>2</sup> Biochemize SL, Zamora 45, 08005 Barcelona, Spain.

<sup>3</sup> Institut de Biotecnologia i de Biomedicina (IBB), Universitat Autònoma de Barcelona, 08193 Bellaterra, Barcelona, Spain.

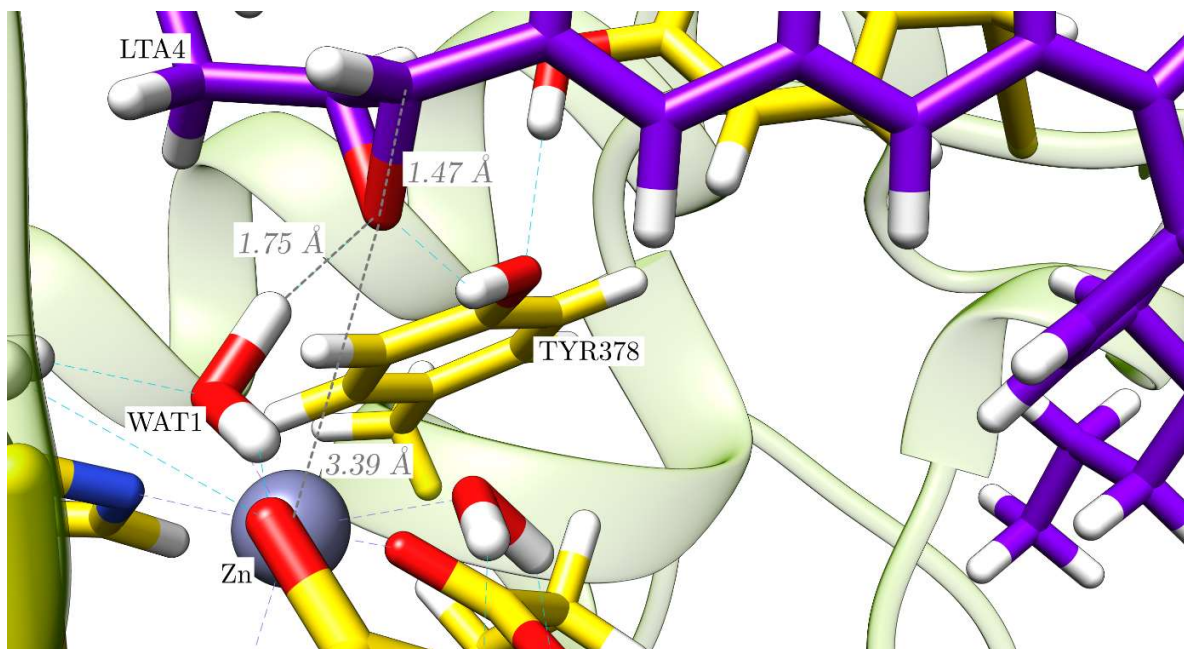

R

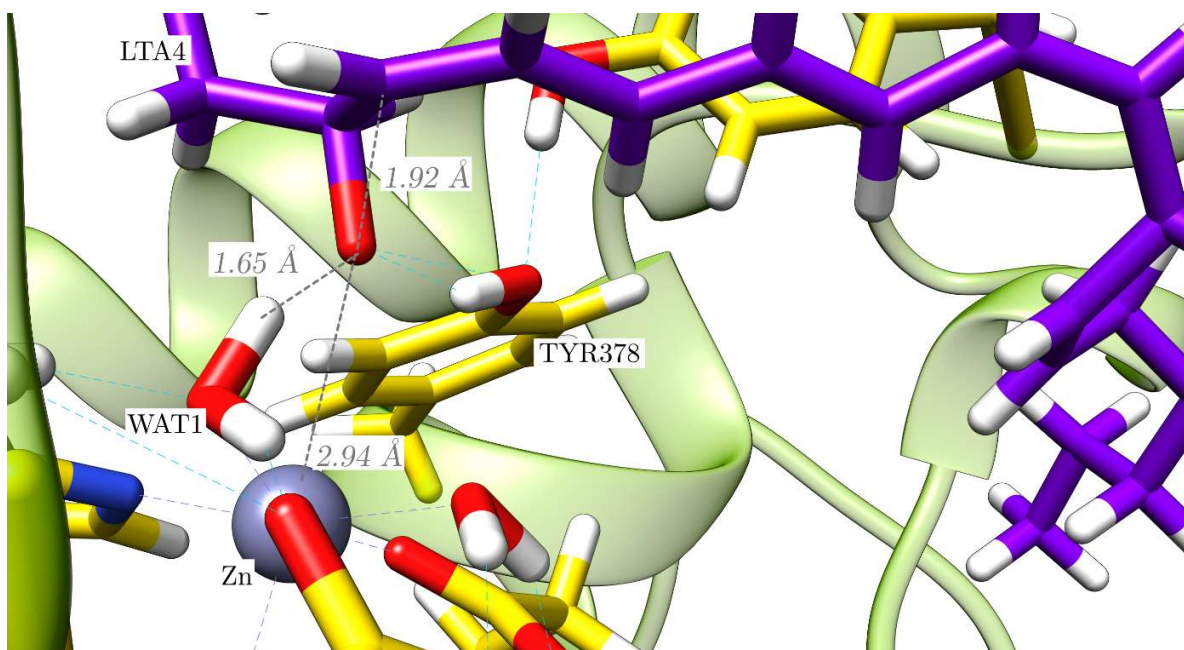

TS1cis

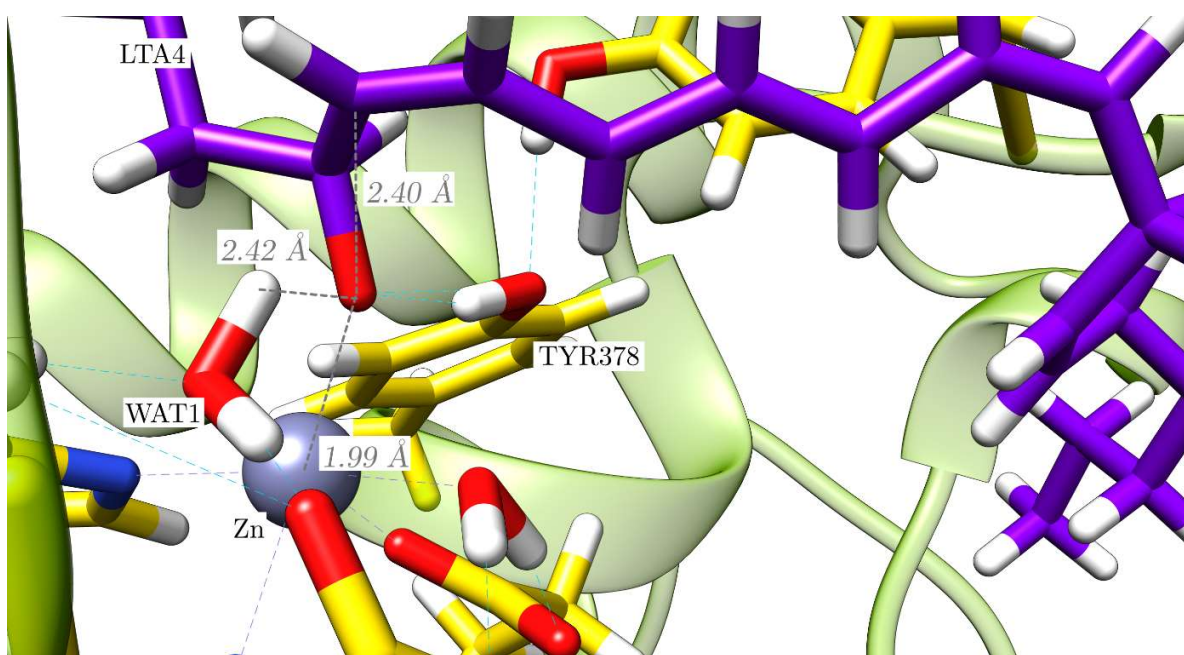

INT1cis

**Figure S1.** Representation of the stationary structures R, TS1cis and INT1cis focused on the region corresponding to the epoxide ring opening.



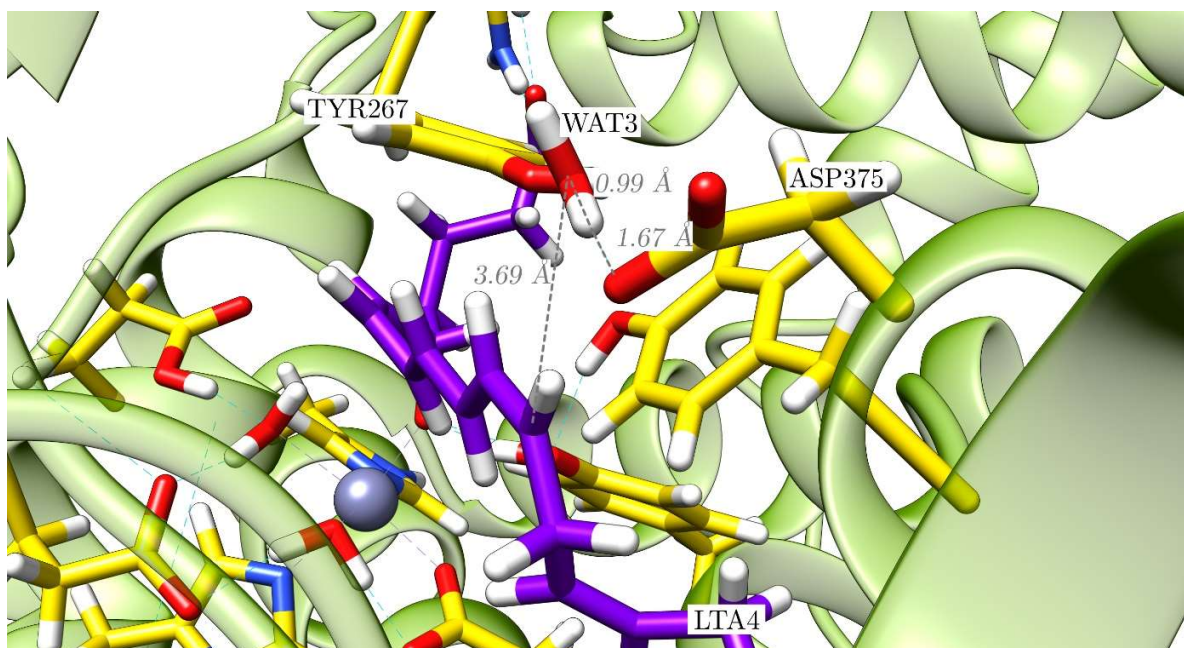

INT1cis

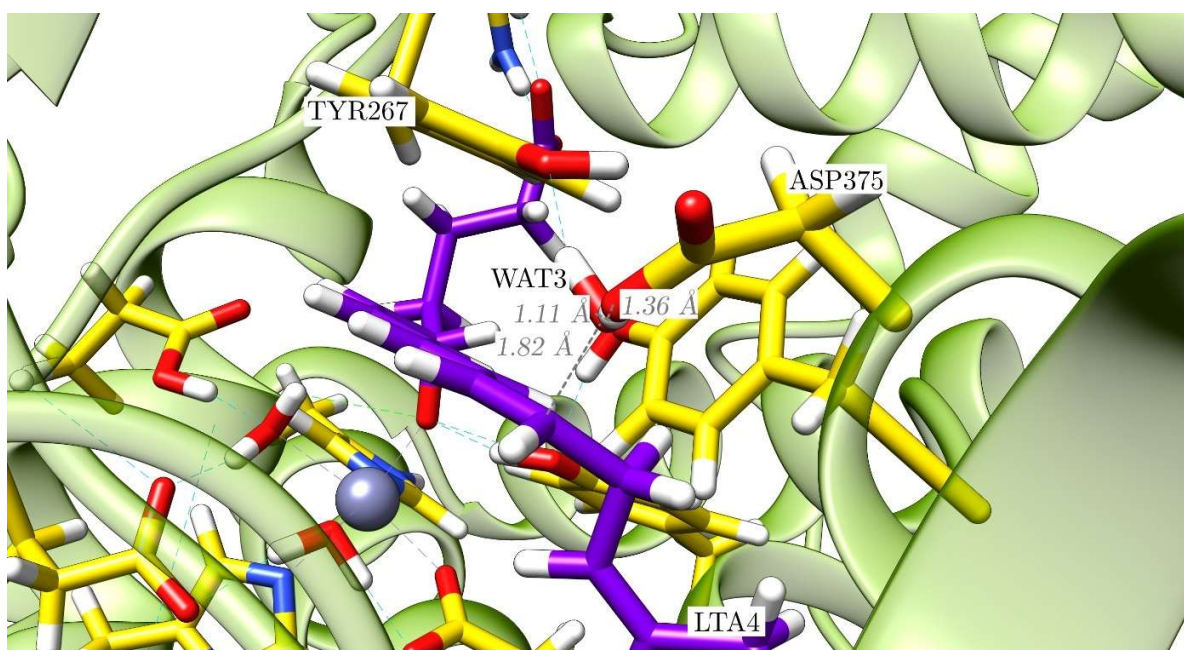

TS2cis

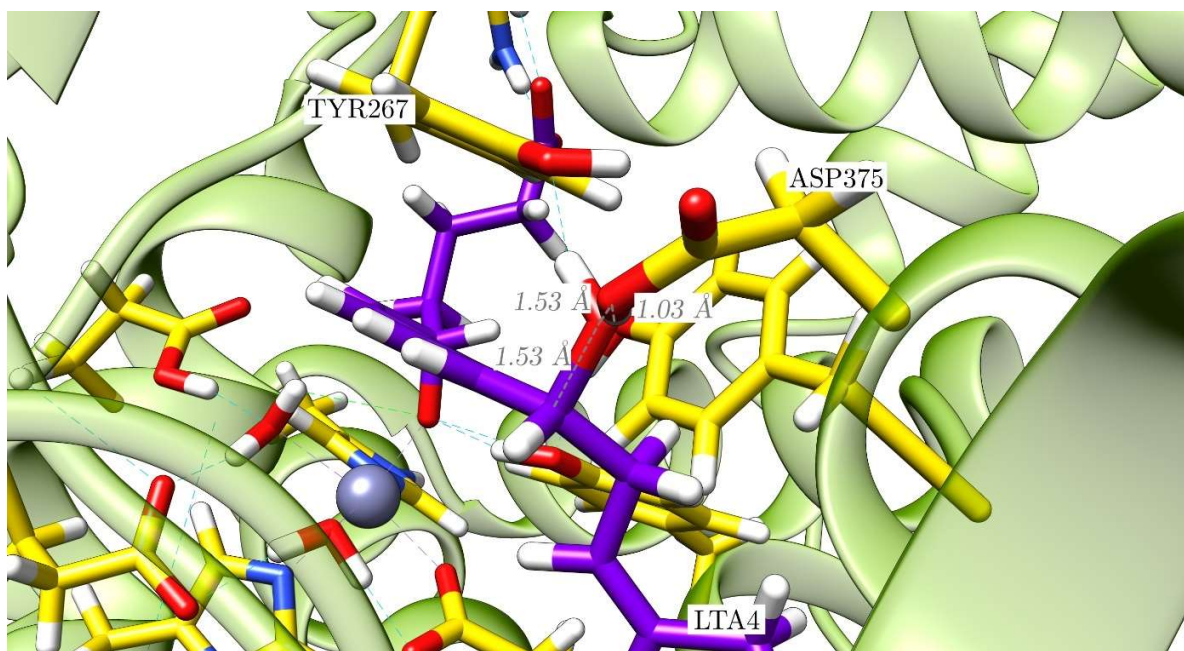

INT2cis

**Figure S2.** Representation of the stationary structures INT1cis, TS2cis and INT2cis focused on the region corresponding to the addition of WAT3 to C<sub>12</sub> of the substrate.



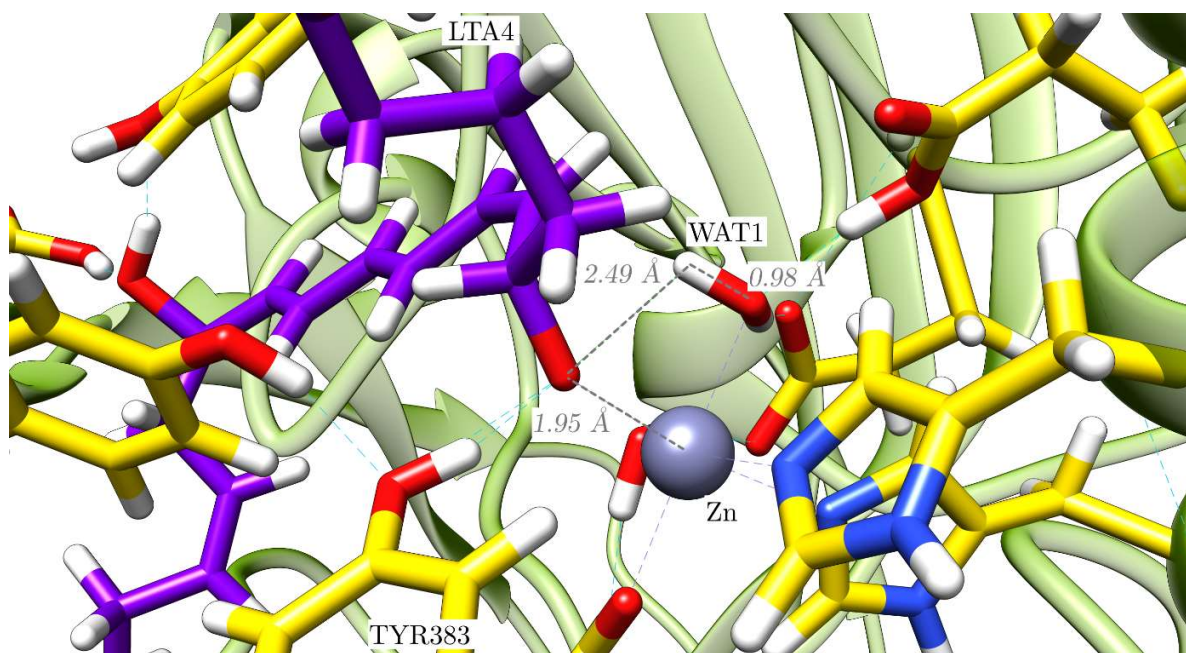

INT2cis

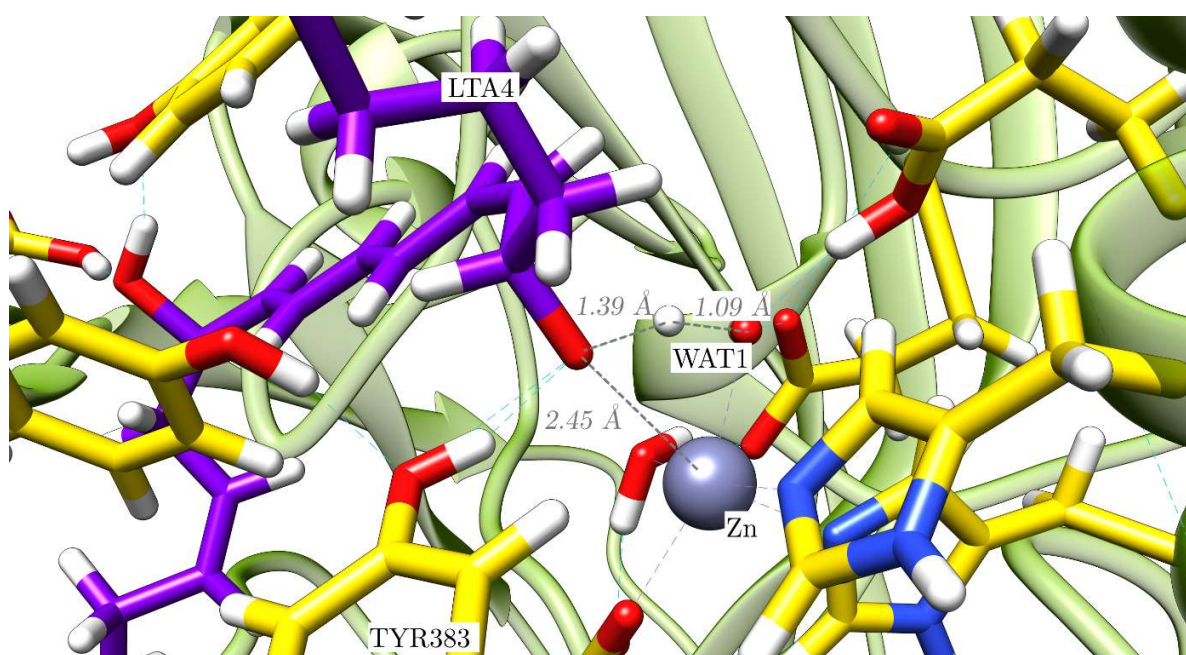

TS3cis

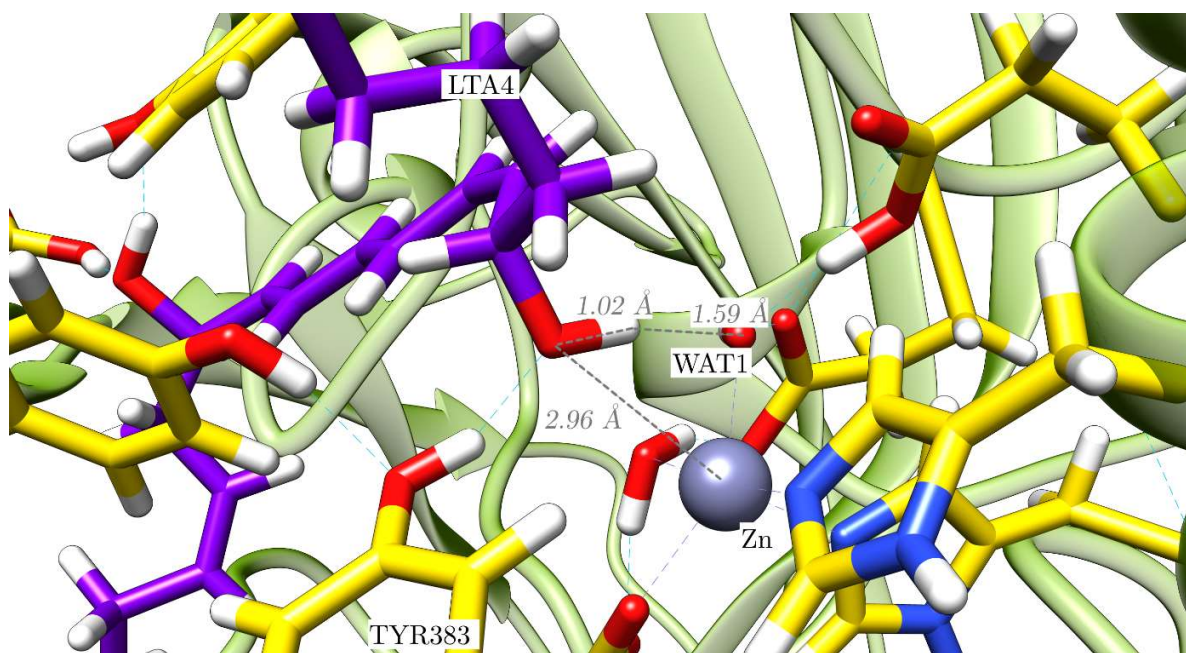

Pcis

**Figure S3.** Representation of the stationary structures INT2cis, TS3cis and Pcis focused on the region corresponding to the final protonation of the oxygen atom bonded to C<sub>6</sub> (the former oxygen atom of the epoxide).



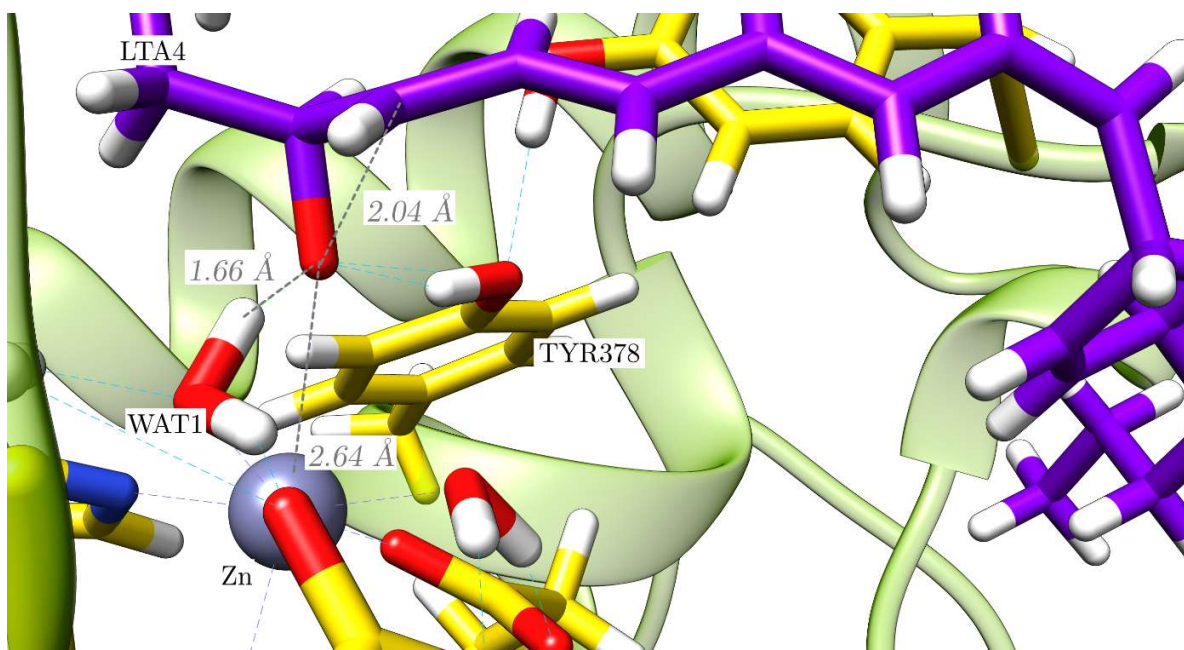

TS1trans

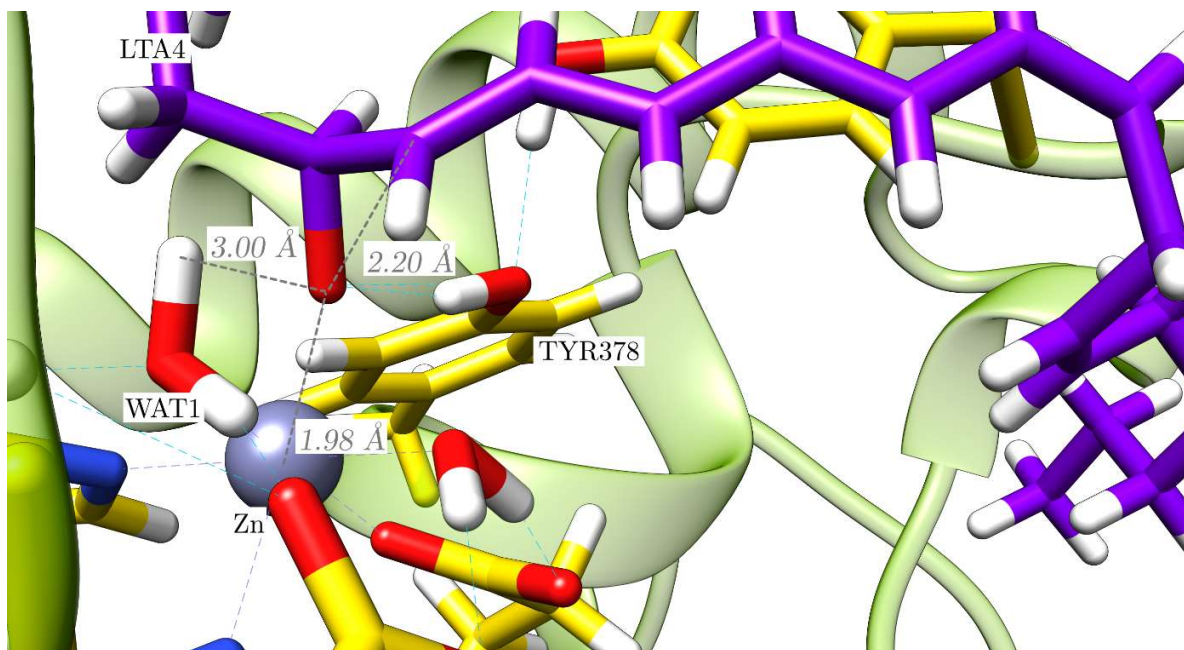

INT1trans

**Figure S4.** Representation of the stationary structures TS1trans and INT1trans focused on the region corresponding to the epoxide ring opening.

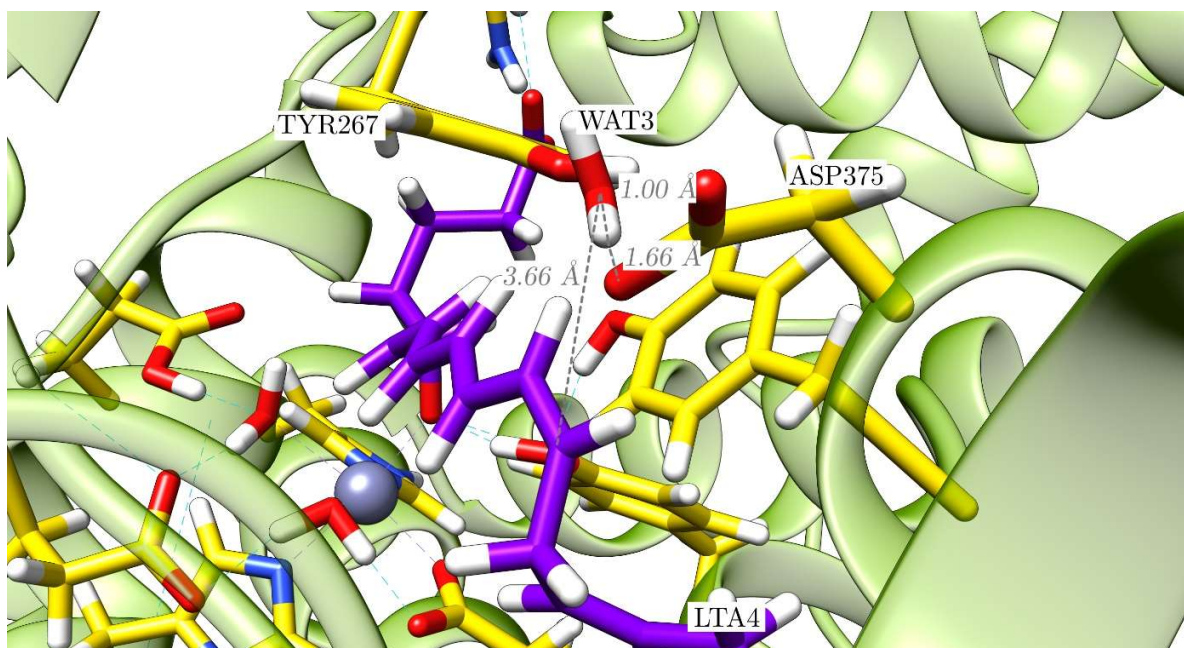

INT1trans

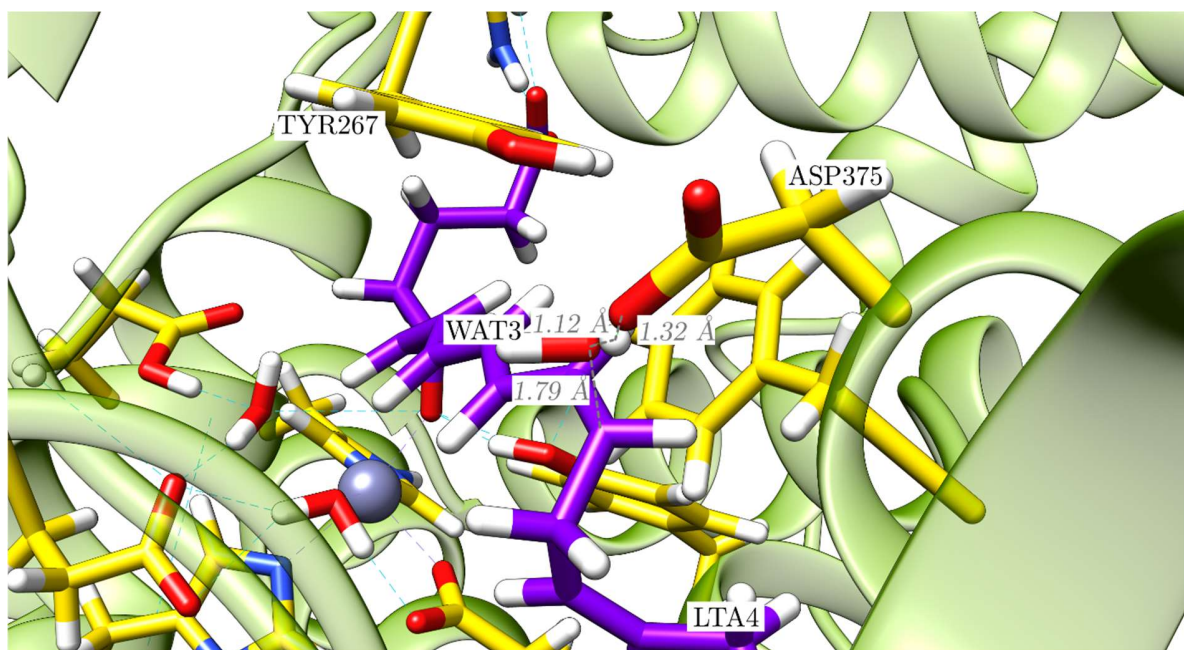

TS2trans



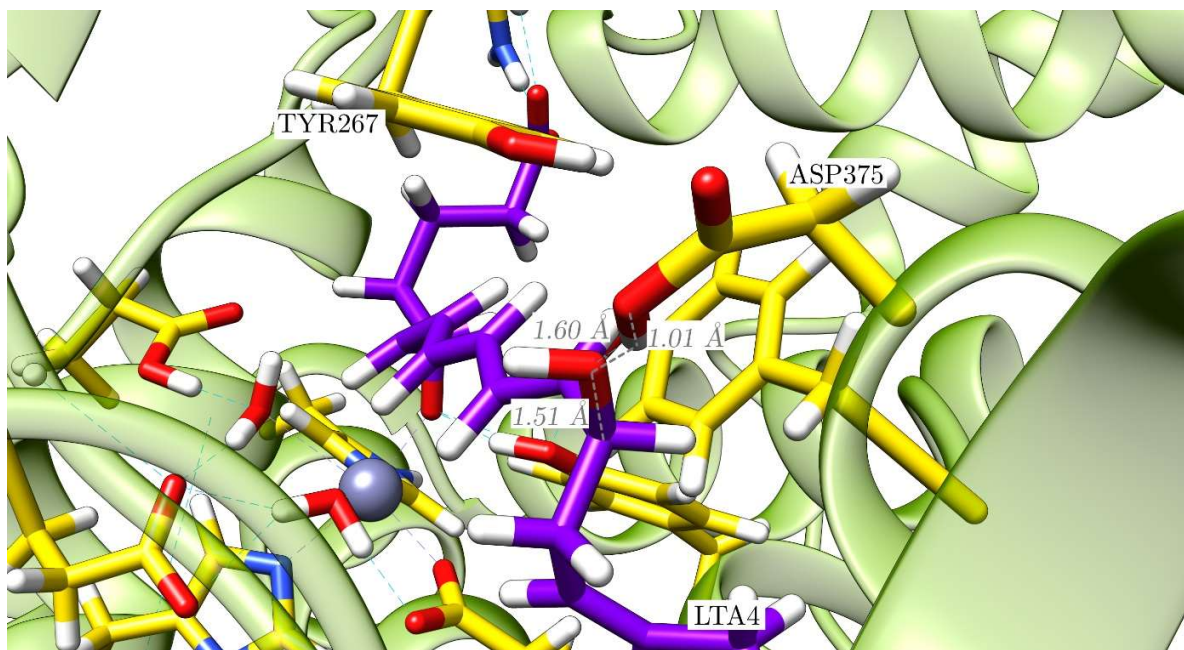

INT2trans

**Figure S5.** Representation of the stationary structures INT1trans, TS2trans and INT2trans focused on the region corresponding to the addition of WAT3 to C<sub>12</sub> of the substrate.

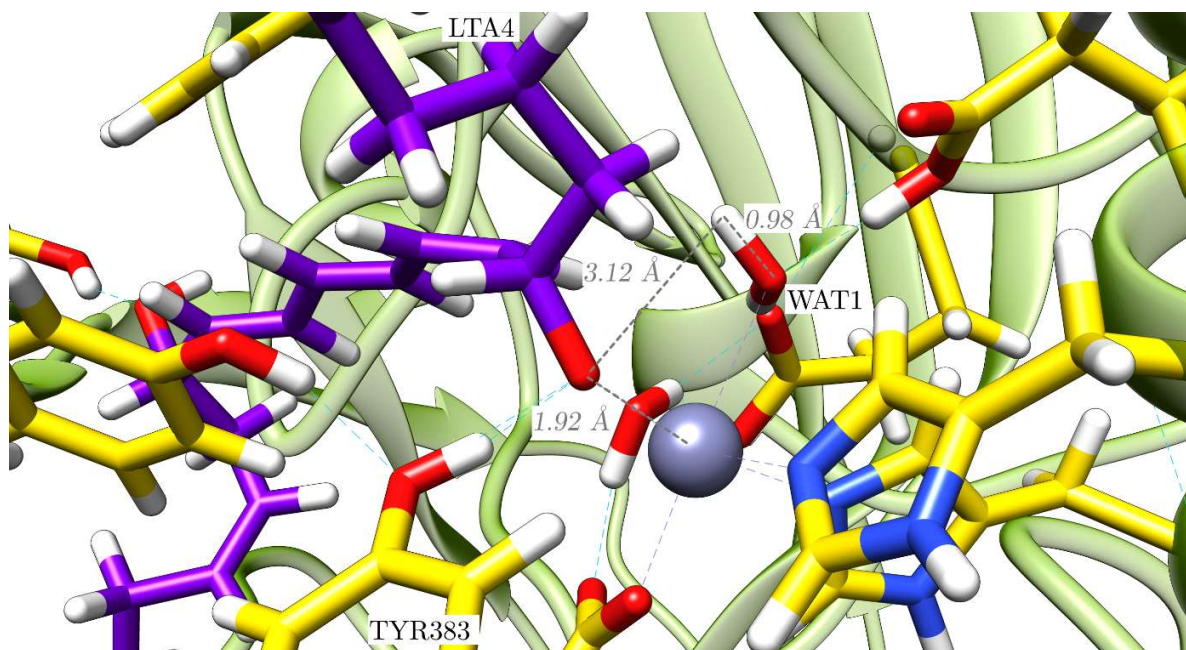

INT2trans

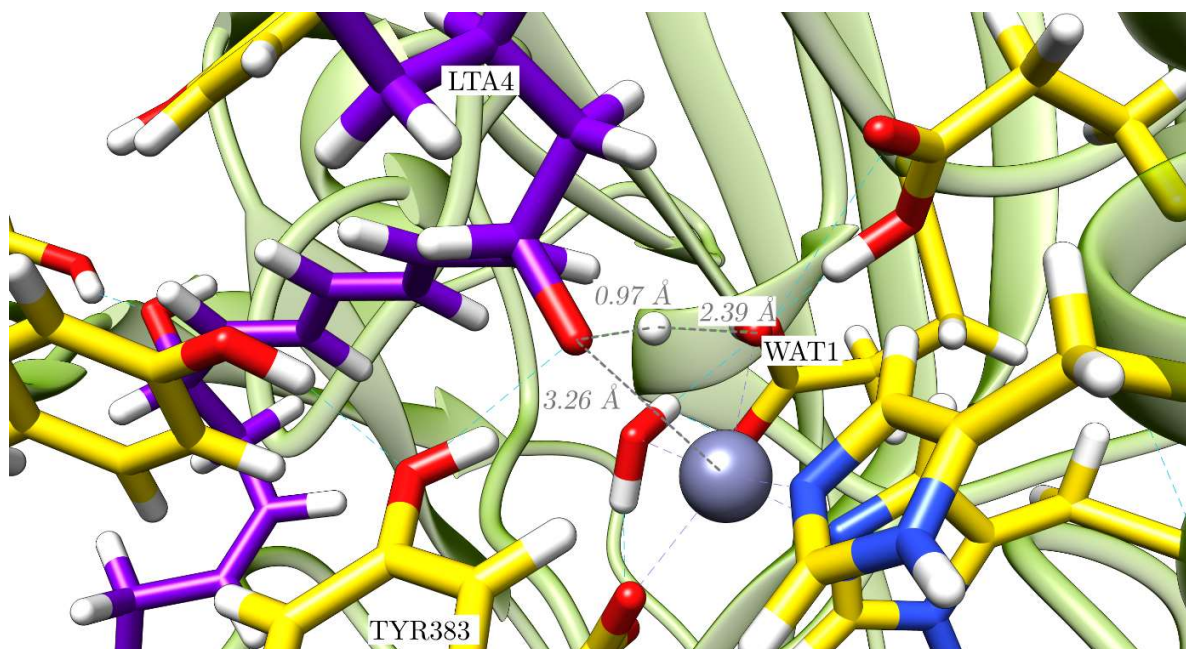

TS3trans



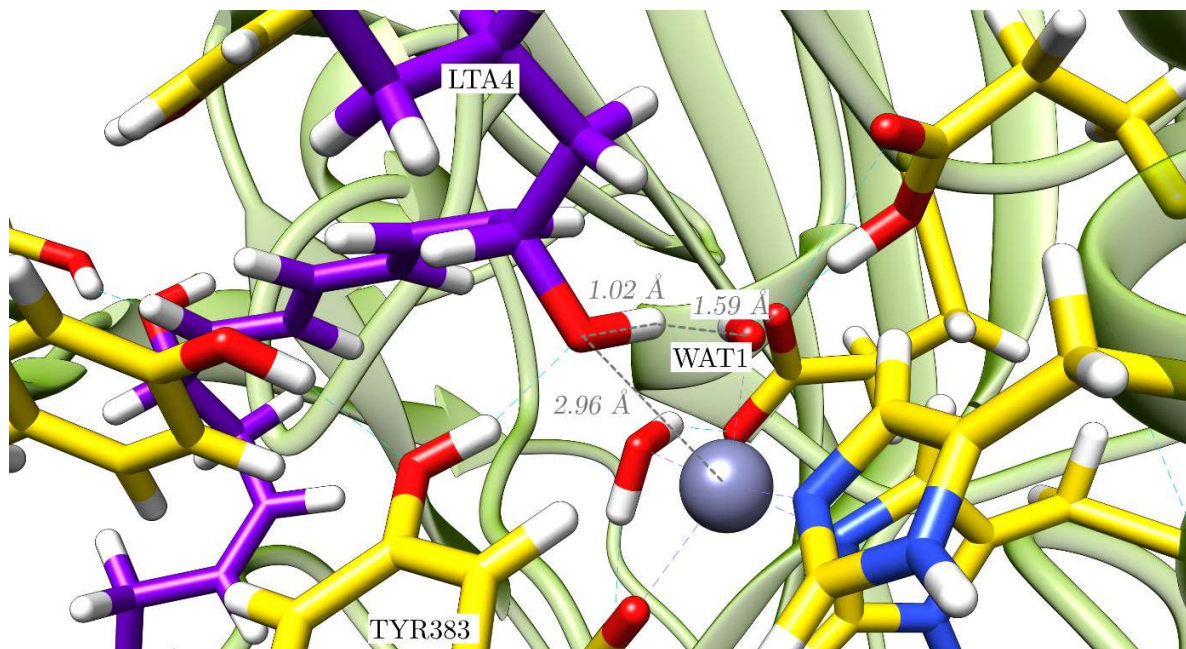

Ptrans

**Figure S6.** Representation of the stationary structures INT2trans, TS3trans and Ptrans focused on the region corresponding to the final protonation of the oxygen atom bonded to C<sub>6</sub> (the former oxygen atom of the epoxide).
